# Supplementary material for: The different tolerance to magnesium deficiency of two grapevine rootstocks relies on the ability to cope with oxidative stress
Source: PubMed Central journal article supplement (PMC6469136; doi:10.1186/s12870-019-1726-x), 2019-04-16
Supplement: 12870_2019_1726_MOESM4_ESM.pdf [file 12870_2019_1726_MOESM4_ESM.pdf]

**Table S4**

| <b>Metabolites modulated only in the comparison 1103P -Mg vs SO4 -Mg; 4 days</b> |  |                  |
|----------------------------------------------------------------------------------|--|------------------|
| Compound                                                                         |  | p (Corr) FC      |
| <b>alkaloids</b>                                                                 |  |                  |
| more abundant in 1103P vs SO4                                                    |  |                  |
| (S)-corytuberine                                                                 |  | 0.035 10080.12   |
| 1,2-dehydroreticulium                                                            |  | 0.035 10080.12   |
| norephedrine                                                                     |  | 0.036 5055.84    |
| <b>amino acids or their derivatives</b>                                          |  |                  |
| more abundant in 1103P vs SO4                                                    |  |                  |
| 3-O-methyldopa                                                                   |  | 0.000 6188.33    |
| N,N-dihydroxy-L-tyrosine                                                         |  | 0.036 1877.57    |
| less abundant in 1103P vs SO4                                                    |  |                  |
| aspartic acid 2                                                                  |  | 0.000 -16.00     |
| ethionine                                                                        |  | 0.016 -7.34      |
| homomethionine                                                                   |  | 0.016 -7.34      |
| L-dopa                                                                           |  | 0.000 -32643.51  |
| <b>aromatic compounds</b>                                                        |  |                  |
| less abundant in 1103P vs SO4                                                    |  |                  |
| biphenyl-2, 3-diol                                                               |  | 0.044 -4.32      |
| <b>carbohydrates</b>                                                             |  |                  |
| more abundant in 1103P vs SO4                                                    |  |                  |
| aldehydo-D-arabinose                                                             |  | 0.000 23691.90   |
| aldehydo-D-ribose                                                                |  | 0.000 23691.90   |
| aldehydo-D-xylose                                                                |  | 0.000 23691.90   |
| aldehydo-L-arabinose                                                             |  | 0.000 23691.90   |
| alpha;-D-ribofuranose                                                            |  | 0.000 23691.90   |
| alpha;-D-xylopyranose                                                            |  | 0.000 23691.90   |
| alpha;-L-arabinofuranose                                                         |  | 0.000 23691.90   |
| beta;-D-ribofuranose                                                             |  | 0.000 23691.90   |
| beta;-D-xylopyranose                                                             |  | 0.000 23691.90   |
| beta;-L-arabinopyranose                                                          |  | 0.000 23691.90   |
| D-ribulose                                                                       |  | 0.000 23691.90   |
| D-xylulose                                                                       |  | 0.000 23691.90   |
| L-ribulose                                                                       |  | 0.000 23691.90   |
| pentose-ring                                                                     |  | 0.000 23691.93   |
| less abundant in 1103P vs SO4                                                    |  |                  |
| maltohexaose                                                                     |  | 0.000 -287939.56 |

|                                                                    |       |          |
|--------------------------------------------------------------------|-------|----------|
| N-acetyl-beta;-glucosaminylamine                                   | 0.000 | -2.84    |
| <b>cofactors</b>                                                   |       |          |
| more abundant in 1103P vs SO4                                      |       |          |
| molybdenum cofactor                                                | 0.044 | 7.38     |
| less abundant in 1103P vs SO4                                      |       |          |
| 7,8-didemethyl-8-hydroxy-5-deazariboflavin                         | 0.038 | -7.48    |
| <b>enzyme inhibitors</b>                                           |       |          |
| more abundant in 1103P vs SO4                                      |       |          |
| 2,4-diamino-6-methyl-5,3'-(3-nitrophenoxy)prop-1'-yloxy pyrimidine | 0.037 | 5.76     |
| disulfiram                                                         | 0.000 | 40.87    |
| isoleucine tetrazole                                               | 0.000 | 16.00    |
| <b>gibberellins</b>                                                |       |          |
| less abundant in 1103P vs SO4                                      |       |          |
| gibberellin A12                                                    | 0.000 | -22.72   |
| methyl gibberellin A9                                              | 0.000 | -22.72   |
| <b>lipids</b>                                                      |       |          |
| more abundant in 1103P vs SO4                                      |       |          |
| 1-18:3-2-16:0-digalactosyldiacylglycerol                           | 0.037 | 5835.99  |
| dipalmitoyl phosphatidate                                          | 0.036 | 3.38     |
| <b>nucleic acid components</b>                                     |       |          |
| more abundant in 1103P vs SO4                                      |       |          |
| 2'-deoxyguanosine                                                  | 0.002 | 8.06     |
| adenosine                                                          | 0.002 | 8.06     |
| less abundant in 1103P vs SO4                                      |       |          |
| pppGpp                                                             | 0.000 | -131.55  |
| <b>phenylpropanoids</b>                                            |       |          |
| more abundant in 1103P vs SO4                                      |       |          |
| ferulate                                                           | 0.000 | 18227.24 |
| pelargonidin 3-O-(6-O-malyl-beta;D-glucoside)                      | 0.000 | 16.00    |
| less abundant in 1103P vs SO4                                      |       |          |
| leachianone G                                                      | 0.037 | -7.82    |
| p-coumaroyltyramine                                                | 0.002 | -7.61    |
| <b>terpenoids</b>                                                  |       |          |
| more abundant in 1103P vs SO4                                      |       |          |
| 1'-hydroxy-gamma;-carotene                                         | 0.035 | 41946.68 |
| beta;-carotene 15,15' epoxide                                      | 0.035 | 41946.68 |
| beta;-cryptoxanthin                                                | 0.035 | 41946.68 |
| epsilon;,epsilon;-carotene-3-diol                                  | 0.035 | 41946.68 |
| less abundant in 1103P vs SO4                                      |       |          |
| kauralexin B2                                                      | 0.000 | -22.72   |
| <b>vitamins</b>                                                    |       |          |

less abundant in 1103P vs SO4

|                                                                                   |  |          |             |
|-----------------------------------------------------------------------------------|--|----------|-------------|
| thiamin                                                                           |  | 0.035    | -8.64       |
| <b>Metabolites modulated only in the comparison 1103P -Mg vs SO4 -Mg; 14 days</b> |  |          |             |
| Compound                                                                          |  | p (Corr) | FC          |
| <b>alkaloids</b>                                                                  |  |          |             |
| less abundant in 1103P vs SO4                                                     |  |          |             |
| (R)-N-methylcoclaurine                                                            |  | 0.041    | -28523.96   |
| (S)-N-methylcoclaurine                                                            |  | 0.041    | -28523.96   |
| S-cheilanthifoline                                                                |  | 0.000    | -16.00      |
| senecionine                                                                       |  | 0.000    | -16.00      |
| <b>amino acids or their derivatives</b>                                           |  |          |             |
| more abundant in 1103P vs SO4                                                     |  |          |             |
| S-carbamylcysteine                                                                |  | 0.000    | 1424.28     |
| less abundant in 1103P vs SO4                                                     |  |          |             |
| 4-guanidinobutyraldehyde                                                          |  | 0.034    | -46.18      |
| allylcysteine                                                                     |  | 0.044    | -4892.33    |
| <b>aromatic compounds</b>                                                         |  |          |             |
| more abundant in 1103P vs SO4                                                     |  |          |             |
| 4-nitrophenol                                                                     |  | 0.000    | 16.00       |
| less abundant in 1103P vs SO4                                                     |  |          |             |
| L-arogenate                                                                       |  | 0.000    | -2.51       |
| puromycin                                                                         |  | 0.036    | -2.60       |
| <b>carboxy acids</b>                                                              |  |          |             |
| more abundant in 1103P vs SO4                                                     |  |          |             |
| glyoxylic acid                                                                    |  | 0.000    | 16.00       |
| <b>coenzyme A-activated compounds</b>                                             |  |          |             |
| more abundant in 1103P vs SO4                                                     |  |          |             |
| 3-hydroxyisovaleryl-CoA                                                           |  | 0.000    | 16.00       |
| propanoyl-CoA                                                                     |  | 0.000    | 2.03        |
| <b>glucosinolates</b>                                                             |  |          |             |
| more abundant in 1103P vs SO4                                                     |  |          |             |
| 3-sinapoyloxypropylglucosinolate                                                  |  | 0.000    | 16.00       |
| S-methyl-5-thio-D-ribose                                                          |  | 0.041    | 3207.84     |
| <b>lipids</b>                                                                     |  |          |             |
| more abundant in 1103P vs SO4                                                     |  |          |             |
| 1-18:1-2-18:3-phosphatidylcholine                                                 |  | 0.000    | 46713708.00 |
| 1-18:2-2-18:2-sn-glycerol-3-phosphocholine                                        |  | 0.000    | 46713708.00 |
| <b>organosulfur compounds</b>                                                     |  |          |             |
| less abundant in 1103P vs SO4                                                     |  |          |             |
| 4-methyl-5-(beta;-hydroxyethyl)thiazole                                           |  | 0.044    | -4892.33    |
| <b>organometallic compounds</b>                                                   |  |          |             |
| more abundant in 1103P vs SO4                                                     |  |          |             |
| chlorophyllide a                                                                  |  | 0.000    | 2.94        |

| <b>phenylpropanoids</b>                                   |                               |                 |
|-----------------------------------------------------------|-------------------------------|-----------------|
|                                                           | more abundant in 1103P vs SO4 |                 |
| feruloyl-CoA                                              |                               | 0.000 16.00     |
|                                                           | less abundant in 1103P vs SO4 |                 |
| 3,5-dihydroxyanisole                                      |                               | 0.011 -4.45     |
| 4-hydroxycinnamic acid                                    |                               | 0.000 -16.00    |
| isoliquiritigenin 4'-glucoside                            |                               | 0.008 -3.84     |
| p-coumaroyltyramine                                       |                               | 0.003 -11.51    |
| <b>terpenoids</b>                                         |                               |                 |
|                                                           | more abundant in 1103P vs SO4 |                 |
| 4,9,13-trimethyltetradeca-2,4,6,8,10,12-hexaene-1,14-dial |                               | 0.017 8299.46   |
|                                                           | less abundant in 1103P vs SO4 |                 |
| (-)-menthol                                               |                               | 0.000 -39919.66 |
| (+)-isomenthol                                            |                               | 0.000 -39919.66 |
| (+)-neoisomenthol                                         |                               | 0.000 -39919.66 |
| (+)-neomenthol                                            |                               | 0.000 -39919.66 |
| (S)-(-)-citronellol                                       |                               | 0.000 -39919.64 |
| loganin                                                   |                               | 0.004 -2.49     |
| <b>vitamin</b>                                            |                               |                 |
|                                                           | less abundant in 1103P vs SO4 |                 |
| 9-mercaptodethiobiotin                                    |                               | 0.000 -4.68     |

**Figure S1**

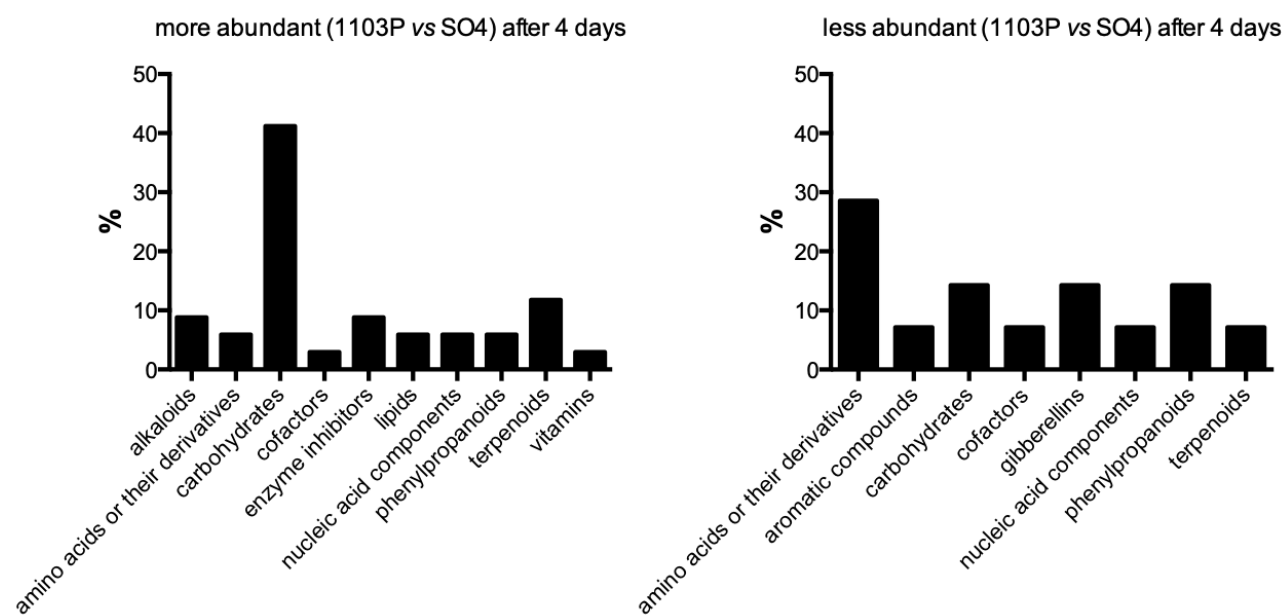

**Figure S1.** Distribution in main chemical classes of metabolites more abundant (34) and less abundant (14) in 1103P relative to SO4 after 4 days of growth without Mg (-Mg). Metabolites were classified using information retrieved from the PlantCyc database [109].

**Figure S2**

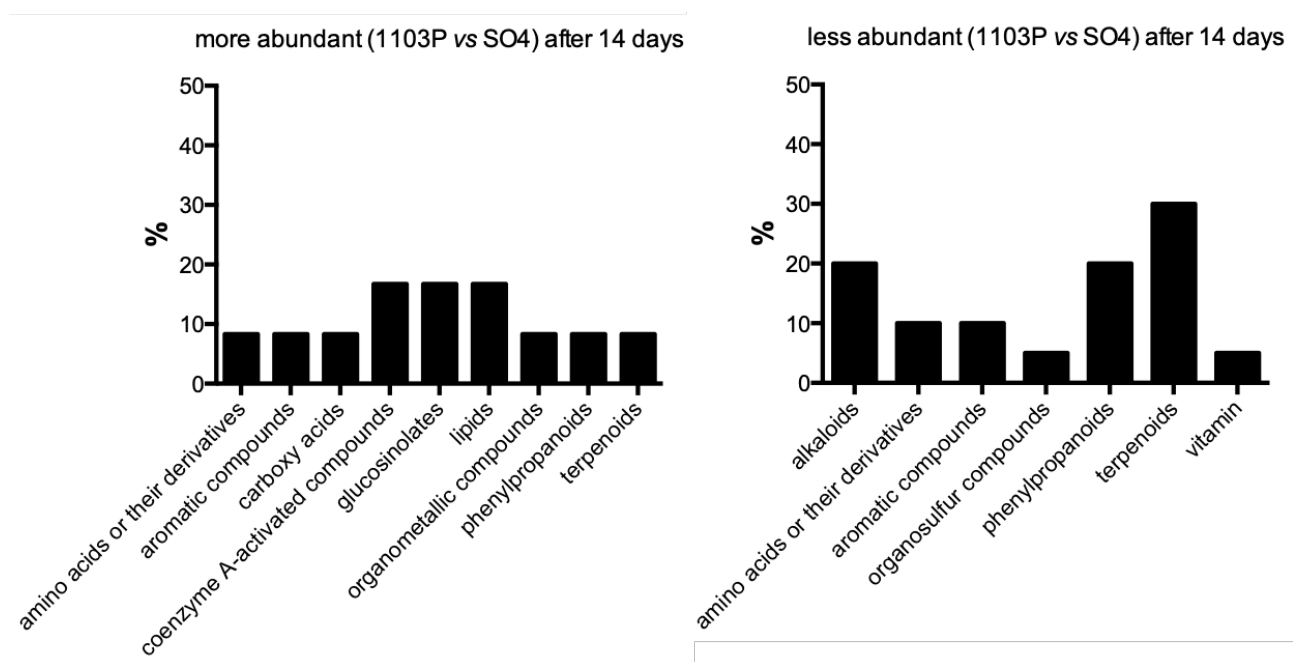

**Figure S2.** Distribution in main chemical classes of metabolites more abundant (12) and less abundant (20) in 1103P relative to SO4 after 14 days of growth without Mg (-Mg). Metabolites were classified using information retrieved from the PlantCyc database [109].

**Figure S3**

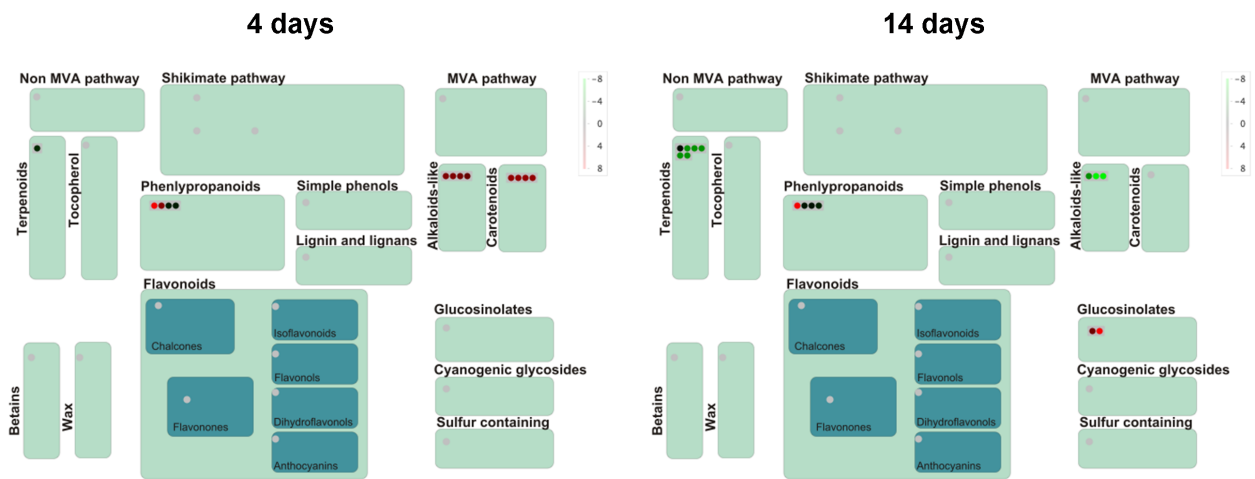

**Figure S3.** MapMan overview display of differentially abundant metabolites 1103P and SO4 concerning the secondary metabolism. The Log<sub>10</sub>(ratio) is shown by the color scale (green indicates a decrease and red an increase in metabolite abundance between 1103P and SO4). The analysis was carried out using MapMan software [123].
