# Supplementary material for: The different tolerance to magnesium deficiency of two grapevine rootstocks relies on the ability to cope with oxidative stress
Source: PubMed Central journal article supplement (PMC6469136; doi:10.1186/s12870-019-1726-x), 2019-04-16
Supplement: 12870_2019_1726_MOESM8_ESM.pdf [file 12870_2019_1726_MOESM8_ESM.pdf]

**Figure S4**

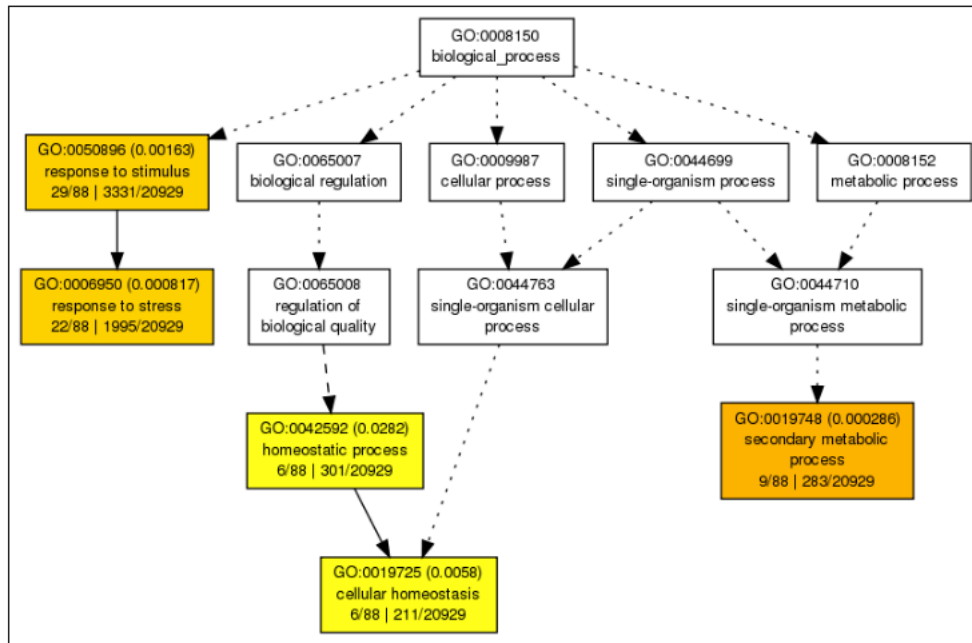

Significance levels and Arrow types Diagram

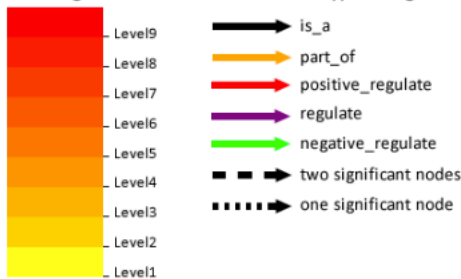

**Figure S4.** Results of Singular Enrichment Analysis (SEA) for the 88 out of 115 up-regulated transcripts between 1103P and SO4 grown in absence of Mg (-Mg) for 4 days with GO terms; the analysis was performed using agriGO v2.0 [126] using the locus ID (Gramene Release 5.0) as reference, Fisher as statistical test method, Yekutieli (FDR under dependency) as Multi-test adjustment method, 0.05 as significant level, 5 as minimum number of mapping entries and Plant GO slim as Gene Ontology type.

**Figure S5**

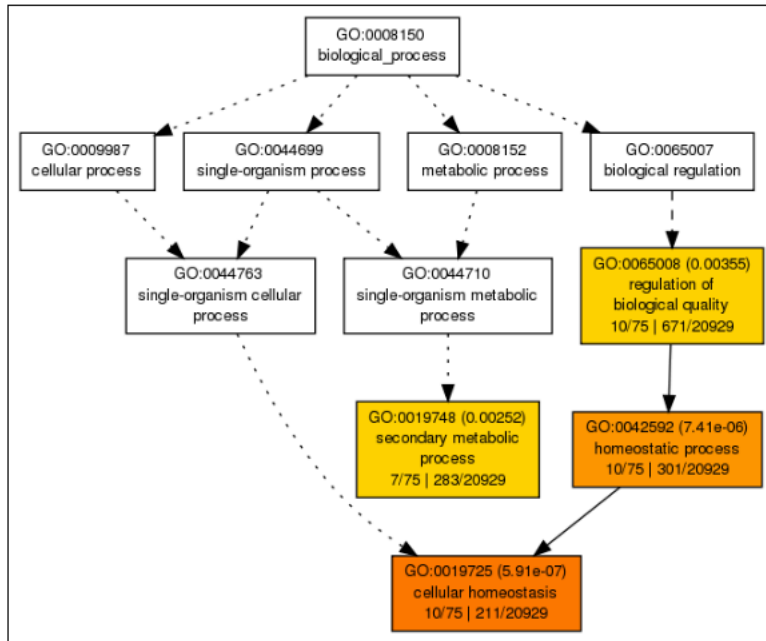

Significance levels and Arrow types Diagram

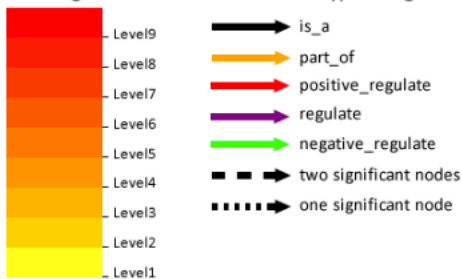

**Figure S5.** Results of Singular Enrichment Analysis (SEA) for the 75 out of 104 down-regulated transcripts between 1103P and SO4 grown in absence of Mg (-Mg) for 4 days with GO terms; the analysis was performed using agriGO v2.0 [126] using the locus ID (Gramene Release 5.0) as reference, Fisher as statistical test method, Yekutieli (FDR under dependency) as Multi-test adjustment method, 0.05 as significant level, 5 as minimum number of mapping entries and Plant GO slim as Gene Ontology type.

**Figure S6**

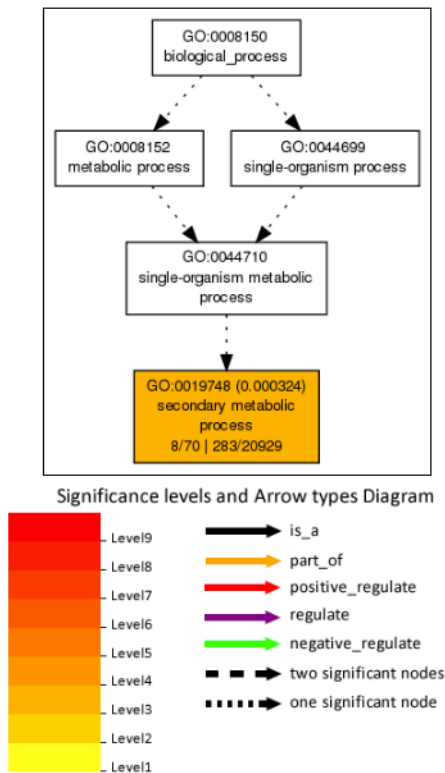

**Figure S6.** Results of Singular Enrichment Analysis (SEA) for the 70 out of 128 up-regulated transcripts between 1103P and SO4 grown in absence of Mg (-Mg) for 14 days with GO terms; the analysis was performed using agriGO v2.0 [126] using the locus ID (Gramene Release 5.0) as reference, Fisher as statistical test method, Yekutieli (FDR under dependency) as Multi-test adjustment method, 0.05 as significant level, 5 as minimum number of mapping entries and Plant GO slim as Gene Ontology type.

**Figure S7**

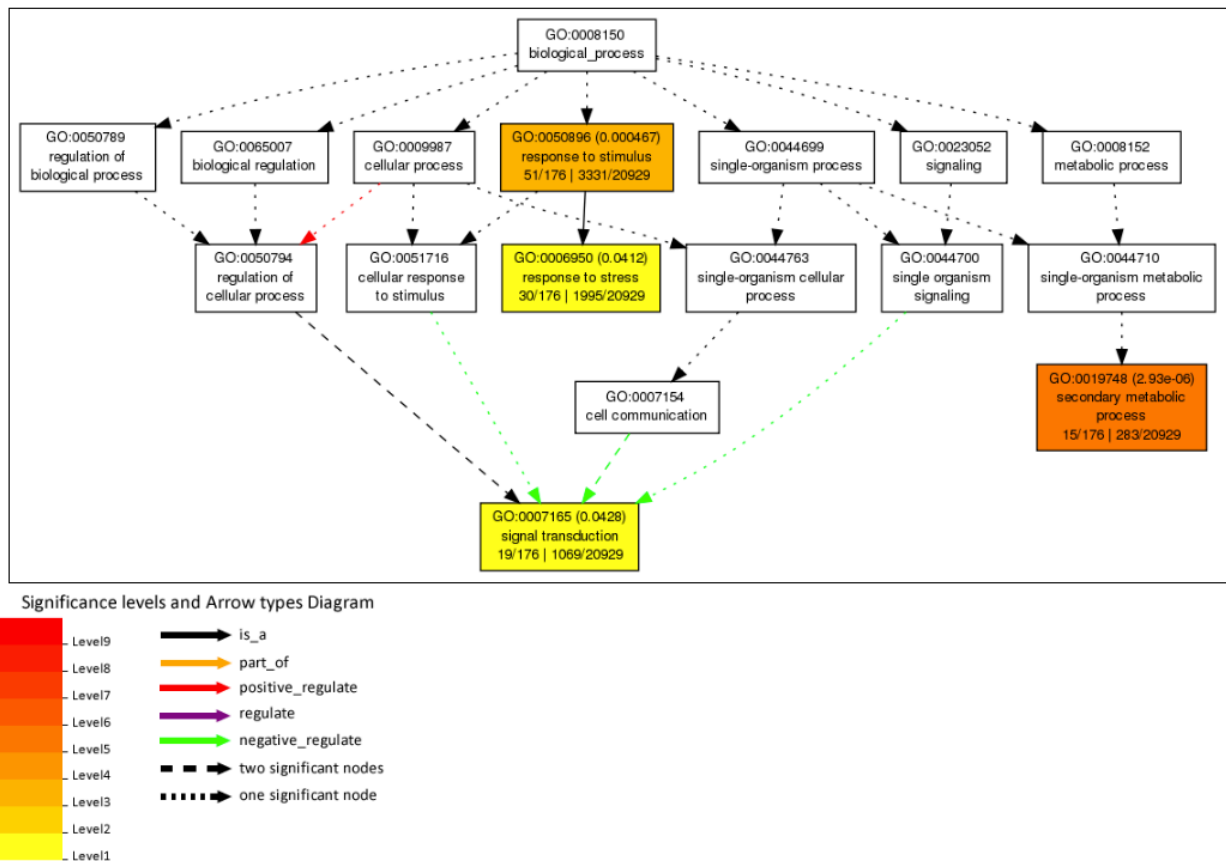

**Figure S7.** Results of Singular Enrichment Analysis (SEA) for the 176 out of 233 down-regulated transcripts between 1103P and SO4 grown in absence of Mg (-Mg) for 14 days with GO terms; the analysis was performed using agriGO v2.0 [126] using the locus ID (Gramene Release 5.0) as reference, Fisher as statistical test method, Yekutieli (FDR under dependency) as Multi-test adjustment method, 0.05 as significant level, 5 as minimum number of mapping entries and Plant GO slim as Gene Ontology type.

**Figure S8**

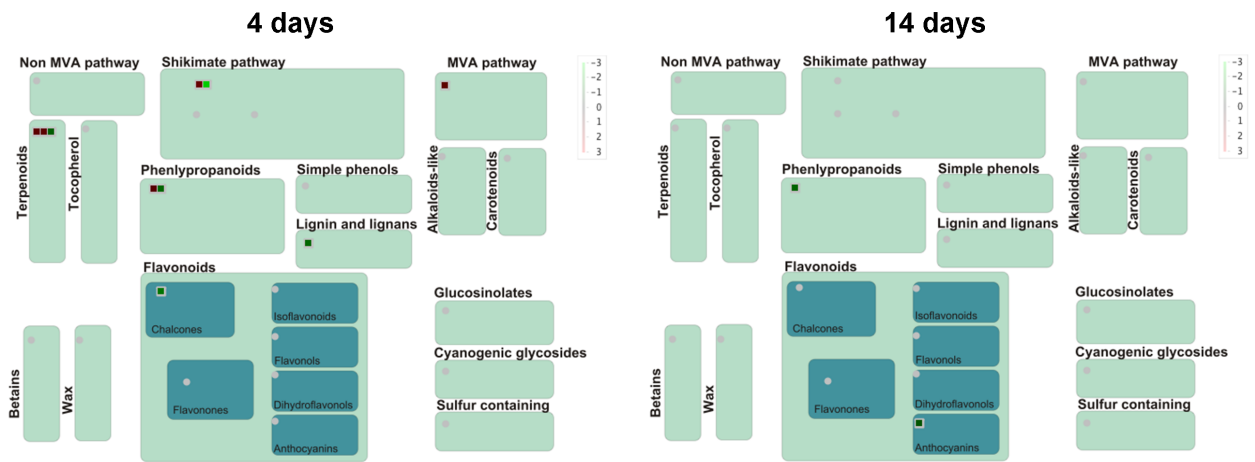

**Figure S8.** MapMan overview display of differentially expressed transcripts between 1103P and SO4 concerning the secondary metabolism. The  $\text{Log}_2(\text{ratio})$  is shown by the color scale (green indicates a decrease and red an increase in transcript abundance between 1103P and SO4). The analysis was carried out using MapMan software [123].
