# Supplementary material for: The different tolerance to magnesium deficiency of two grapevine rootstocks relies on the ability to cope with oxidative stress
Source: PubMed Central journal article supplement (PMC6469136; doi:10.1186/s12870-019-1726-x), 2019-04-16
Supplement: 12870_2019_1726_MOESM9_ESM.pdf [file 12870_2019_1726_MOESM9_ESM.pdf]

**Table S8**

| <b>1103P +Mg vs SO4 +Mg; 4 days</b>  |                         |                                           |                      |                            |
|--------------------------------------|-------------------------|-------------------------------------------|----------------------|----------------------------|
| <b>Probe ID</b>                      | <b>V1 transcript ID</b> | <b>Description</b>                        | <b>Microarray FC</b> | <b>Real-time RT-PCR FC</b> |
| CHR3_JGVV38_152_T01                  | VIT_03s0038g03180       | Flavin-containing monooxygenase           | -2.01                | -4.15 ± 0.59               |
| <b>1103P -Mg vs SO4 -Mg; 4 days</b>  |                         |                                           |                      |                            |
| <b>Probe ID</b>                      | <b>V1 transcript ID</b> | <b>Description</b>                        | <b>Microarray FC</b> | <b>Real-time RT-PCR FC</b> |
| CHR11_JGVV103_64_T01                 | VIT_11s0103g00010       | Sodium transporter family protein         | 2.35                 | 1.38 ± 0.40                |
| CHR14_JGVV66_153_T01                 | VIT_14s0066g01670       | Putative alpha-dioxygenase family protein | -2.06                | -1.76 ± 0.01               |
| CHR18_JGVV1_805_T01                  | VIT_18s0001g11430       | Cytochrome P450 CYP82D47                  | -3.90                | -5.41 ± 1.01               |
| <b>1103P +Mg vs SO4 +Mg; 14 days</b> |                         |                                           |                      |                            |
| <b>Probe ID</b>                      | <b>V1 transcript ID</b> | <b>Description</b>                        | <b>Microarray FC</b> | <b>Real-time RT-PCR FC</b> |
| CHR7_JGVV31_256_T01                  | VIT_07s0031g02820       | Magnesium transporter CorA                | 2.04                 | 18.22 ± 1.42               |
| <b>1103P -Mg vs SO4 -Mg; 14 days</b> |                         |                                           |                      |                            |
| <b>Probe ID</b>                      | <b>V1 transcript ID</b> | <b>Description</b>                        | <b>Microarray FC</b> | <b>Real-time RT-PCR FC</b> |
| CHR13_JGVV106_43_T01                 | VIT_13s0106g00580       | Potassium channel AKT1                    | -2.91                | -2.59 ± 0.11               |
| CHR13_JGVV67_99_T01                  | VIT_13s0067g02360       | Peroxidase                                | -2.55                | -5.48 ± 1.71               |
| CHR19_JGVV93_24_T01                  | VIT_19s0093g00350       | Glutathione S-transferase                 | 2.13                 | 2.52 ± 0.26                |

**Table S9**

| <b>Probe ID</b>      | <b>V1 transcript ID</b> | <b>Description</b>                        | <b>Forward primer</b>        | <b>Reverse primer</b>         |
|----------------------|-------------------------|-------------------------------------------|------------------------------|-------------------------------|
| CHR11_JGVV103_64_T01 | VIT_11s0103g00010       | Potassium-sodium symporter HKT2           | 5'-AGACCCCTAAACTCAGTG-3'     | 5'-CTCCATCTCCAACAAATCCA-3'    |
| CHR13_JGVV106_43_T01 | VIT_13s0106g00580       | Potassium channel AKT1                    | 5'-TGGAAGGAGTTTGGTGGAG-3'    | 5'-TTGCTGTCGGATTCATTGG-3'     |
| CHR13_JGVV67_99_T01  | VIT_13s0067g02360       | Peroxidase                                | 5'-TGGAGAGATTAGGAAGAACTG-3'  | 5'-CAAGGATGGTGATACAAAGGG-3'   |
| CHR14_JGVV66_153_T01 | VIT_14s0066g01670       | Putative alpha-dioxygenase family protein | 5'-TTCATTGACTGAGGAGTTTAC-3'  | 5'-AAGGGTGGAGATTGTTGAG-3'     |
| CHR18_JGVV1_805_T01  | VIT_18s0001g11430       | Cytochrome P450 CYP82D47                  | 5'-TTGATATGAGCGAGAGTTTGG-3'  | 5'-CAAGCGTGGGAGATAAGAA-3'     |
| CHR19_JGVV93_24_T01  | VIT_19s0093g00350       | Glutathione S-transferase                 | 5'-CCCTACTTTGTCTCTCTGTA-3'   | 5'-CTTGTCTGTTTGTCTCCCTT-3'    |
| CHR3_JGVV38_152_T01  | VIT_03s0038g03180       | Flavin-containing monooxygenase           | 5'-CTACTGCCATCCCTAAAATCA-3'  | 5'-ACCTCTTCCATTCTCCTTTC-3'    |
| CHR7_JGVV31_256_T01  | VIT_07s0031g02820       | Magnesium transporter MRS2-F              | 5'-AAGAAGAAAAAACTGTTGGGTT-3' | 5'-TATAAAGCATAAAAGACAAGGCG-3' |
|                      | VIT_08s0040g00980       | Tubulin beta chain                        | 5'-CCCCTCTCCTTACTATGA-3'     | 5'-ICTGGCACTATTACAACCTGG-3'   |
|                      | VIT_06s0004g03220       | Elongation factor 1-alpha                 | 5'-GTGCGTCATAGTTTTCTGCC-3'   | 5'-AAAGAGGACACGACACAACAT-3'   |
