# Supplementary material for: The different tolerance to magnesium deficiency of two grapevine rootstocks relies on the ability to cope with oxidative stress
Source: BMC Plant Biol. 2019 Apr 16;19:148. doi: 10.1186/s12870-019-1726-x (PMC6469136; doi:10.1186/s12870-019-1726-x)
Supplement: Supplementary file 10 — Table S10. Mapping file of the differentially abundant metabolites identified at 4 and 14 days used to carry out the MapMan analyses. Bin code, name, identifier and type were reported for each metabolite. (XLSX 11 kb) [file 12870_2019_1726_MOESM10_ESM.xlsx]

## Sheet: Foglio1
BINCODE	NAME	IDENTIFIER	TYPE
19	tetrapyrrole synthesis	chlorophyllide a	M
24	bioderadation of xenobiotcs	biphenyl-2, 3-diol	M
24	bioderadation of xenobiotcs	4-nitrophenol	M
1.2.1005	PS.photorepiration.glyoxylate	glyoxylic acid	M
10.1	cell wall precursor synthesis	aldehydo-D-xylose	M
10.1	cell wall precursor synthesis	aldehydo-L-arabinose	M
10.1	cell wall precursor synthesis	beta;-L-arabinopyranose	M
10.1	cell wall precursor synthesis	alpha;-L-arabinofuranose	M
10.1	cell wall precursor synthesis	alpha;-D-xylopyranose	M
10.1	cell wall precursor synthesis	beta;-D-xylopyranose	M
11.1	lipid metabolism.FA synthesis and FA elongation	1-18:3-2-16:0-digalactosyldiacylglycerol	M
11.3	lipid metabolism.phospholipid synthesis	dipalmitoyl phosphatidate	M
11.3	lipid metabolism.phospholipid synthesis	1-18:1-2-18:3-phosphatidylcholine	M
11.3	lipid metabolism.phospholipid synthesis	1-18:2-2-18:2-sn-glycerol-3-phosphocholine	M
11.9	lipid metabolism.degradation	4,9,13-trimethyltetradeca-2,4,6,8,10,12-hexaene-1,14-dial	M
13.1.3	amino acid metabolism.synthesis.aspartate family	aspartic acid	M
13.1.6.2	amino acid metabolism.synthesis.aromatic aa.phenylalanine and tyrosine	L-arogenate	M
13.2.2.3	amino acid metabolism.degradation.glutamate family.arginine	4-guanidinobutyraldehyde	M
13.2.4	amino acid metabolism.degradation.branched chain group	3-hydroxyisovaleryl-CoA	M
13.2.4	amino acid metabolism.degradation.branched chain group	propanoyl-CoA	M
16.1.5	secondary metabolism.isoprenoids.terpenoids	loganin	M
16.1.5	secondary metabolism.isoprenoids.terpenoids	(-)-menthol	M
16.1.5	secondary metabolism.isoprenoids.terpenoids	(+)-isomenthol	M
16.1.5	secondary metabolism.isoprenoids.terpenoids	(+)-neoisomenthol	M
16.1.5	secondary metabolism.isoprenoids.terpenoids	(+)-neomenthol	M
16.1.5	secondary metabolism.isoprenoids.terpenoids	(S)-(-)-citronellol	M
16.1.4	secondary metabolism.isoprenoids.carotenoids	1'-hydroxy-gamma;-carotene	M
16.1.4	secondary metabolism.isoprenoids.carotenoids	beta;-carotene 15,15' epoxide	M
16.1.4	secondary metabolism.isoprenoids.carotenoids	beta;-cryptoxanthin	M
16.1.4	secondary metabolism.isoprenoids.carotenoids	epsilon;,epsilon;-carotene-3-diol	M
16.1.5	secondary metabolism.isoprenoids.terpenoids	kauralexin B2	M
16.2	secondary metabolism.phenylpropanoids	pelargonidin 3-O-(6-O-malyl-beta;D-glucoside)	M
16.2	secondary metabolism.phenylpropanoids	feruloyl-CoA	M
16.2	secondary metabolism.phenylpropanoids	3,5-dihydroxyanisole	M
16.2	secondary metabolism.phenylpropanoids	4-hydroxycinnamic acid	M
16.2	secondary metabolism.phenylpropanoids	isoliquiritigenin 4'-glucoside	M
16.2	secondary metabolism.phenylpropanoids	ferulate	M
16.2	secondary metabolism.phenylpropanoids	leachianone G	M
16.2	secondary metabolism.phenylpropanoids	p-coumaroyltyramine	M
16.20	secondary metabolism.amino acid derivatives	homomethionine	M
16.20	secondary metabolism.amino acid derivatives	L-dopa	M
16.20	secondary metabolism.amino acid derivatives	puromycin	M
16.4.1	secondary metabolism.N misc.alkaloid-like	(S)-corytuberine	M
16.4.1	secondary metabolism.N misc.alkaloid-like	1,2-dehydroreticulinium	M
16.4.1	secondary metabolism.N misc.alkaloid-like	norephedrine	M
16.4.1	secondary metabolism.N misc.alkaloid-like	N,N-dihydroxy-L-tyrosine	M
16.4.1	secondary metabolism.N misc.alkaloid-like	(S)-N-methylcoclaurine	M
16.4.1	secondary metabolism.N misc.alkaloid-like	S-cheilanthifoline	M
16.4.1	secondary metabolism.N misc.alkaloid-like	senecionine	M
16.4.1	secondary metabolism.N misc.alkaloid-like	(R)-N-methylcoclaurine	M
16.5.1	secondary metabolism.sulfur-containing.glucosinolates	S-methyl-5-thio-D-ribose	M
16.5.1	secondary metabolism.sulfur-containing.glucosinolates	3-sinapoyloxypropylglucosinolate	M
17.6.1	hormone metabolism.gibberelin.syhthesis-degradation	gibberellin A12	M
17.6.1	hormone metabolism.gibberelin.syhthesis-degradation	methyl gibberellin A9	M
18.1	Co-factor and vitamin metabolism.molybdenum cofactor	molybdenum cofactor	M
18.2	Co-factor and vitamin metabolism.thiamine	thiamin	M
18.2	Co-factor and vitamin metabolism.thiamine	4-methyl-5-(beta;-hydroxyethyl)thiazole	M
18.3	Co-factor and vitamin metabolism.riboflavin	7,8-didemethyl-8-hydroxy-5-deazariboflavin	M
18.6	Co-factor and vitamin metabolism.biotin	9-mercaptodethiobiotin	M
2.2	major CHO metabolism.degradation	maltohexaose	M
2.2	major CHO metabolism.degradation	N-acetyl-beta;-glucosaminylamine	M
21.2	redox ascorbate and glutathione	allylcysteine	M
23.1.99	nucleotide metabolism.synthesis.unspecified	aldehydo-D-ribose	M
23.1.99	nucleotide metabolism.synthesis.unspecified	beta;-D-ribofuranose	M
23.1.99	nucleotide metabolism.synthesis.unspecified	D-ribulose	M
23.1.99	nucleotide metabolism.synthesis.unspecified	L-ribulose	M
23.1.99	nucleotide metabolism.synthesis.unspecified	alpha;-D-ribofuranose	M
23.1.99	nucleotide metabolism.synthesis.unspecified	2'-deoxyguanosine	M
23.1.99	nucleotide metabolism.synthesis.unspecified	adenosine	M
35.1	not assigned.no ontology	ethionine	M
35.1	not assigned.no ontology	2,4-diamino-6-methyl-5,3'-(3-nitrophenoxy)prop-1'-yloxypyrimidine	M
35.1	not assigned.no ontology	disulfiram	M
35.1	not assigned.no ontology	isoleucine tetrazole	M
35.1	not assigned.no ontology	pppGpp	M
35.1	not assigned.no ontology	S-carbamylcysteine	M
35.2	not assigned.unknown	3-O-methyldopa	M
35.2	not assigned.unknown	aldehydo-D-arabinose	M
35.2	not assigned.unknown	D-xylulose	M
35.2	not assigned.unknown	pentose-ring	M
